# Supplementary material
Source: Springer Nature journal article supplement (https://www.springermedizin.de/resource/supplementary/12889_2014_7280_MOESM18_ESM.pdf/9499334)

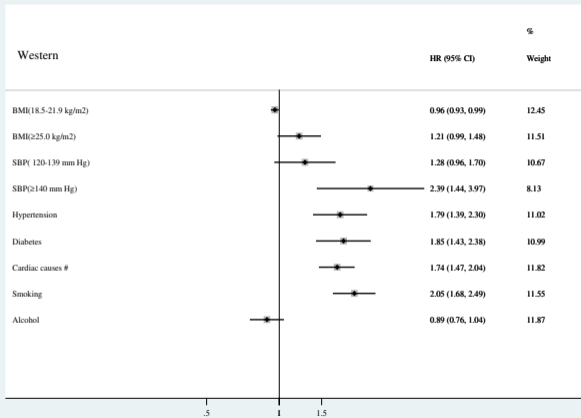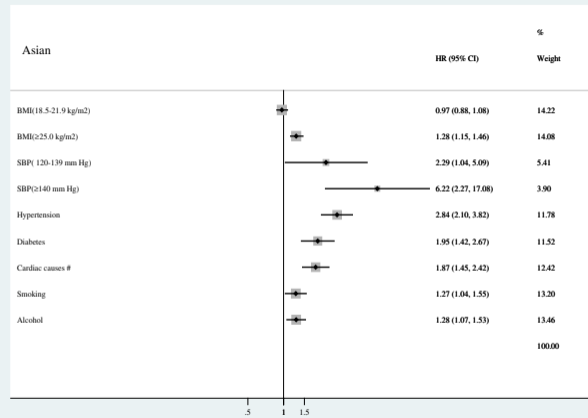

Supplement: MOESM18 [file 9499334]
